# Supplementary material
Source: PubMed Central journal article supplement (PMC2699758)

Fig. S1

A.

Kv2.1<sup>-/-</sup> islets

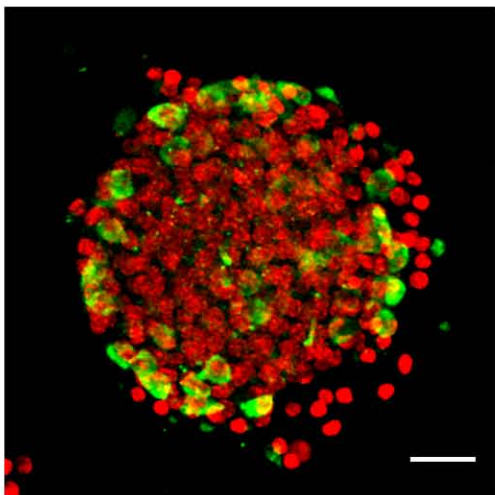

B.

C57 islets

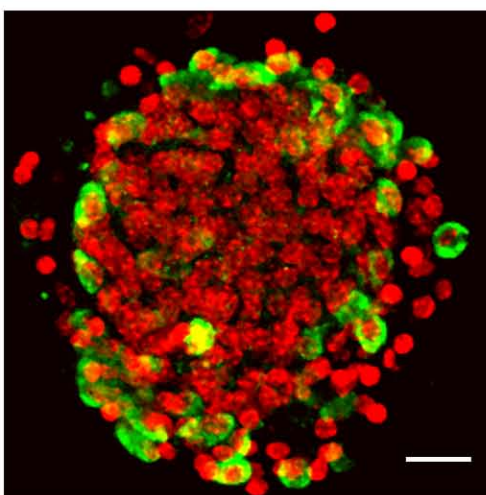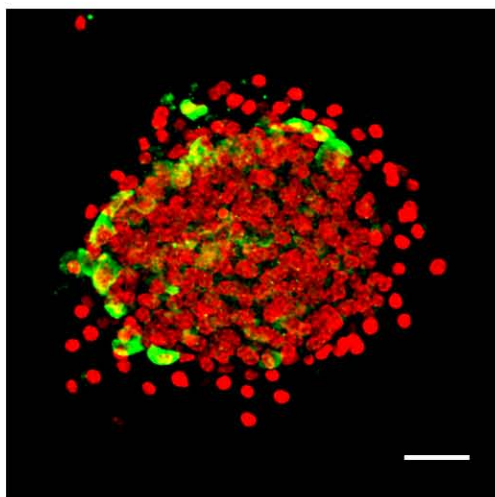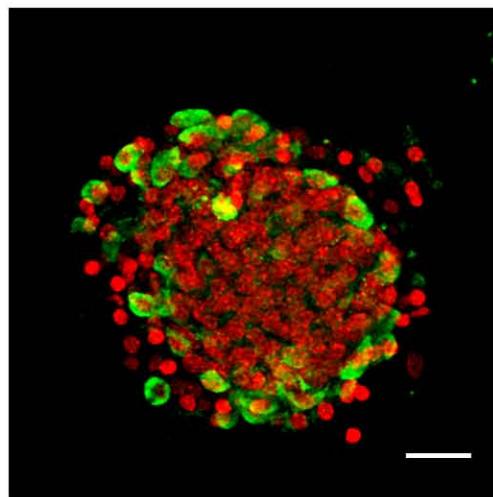

**Fig. S2**

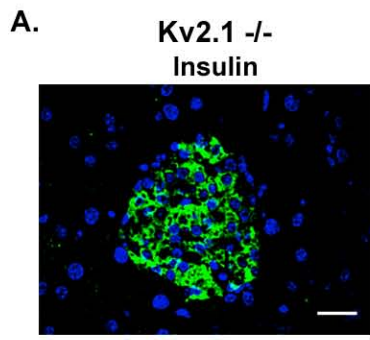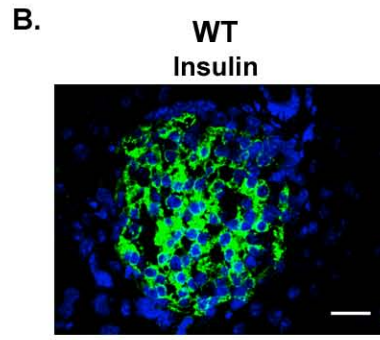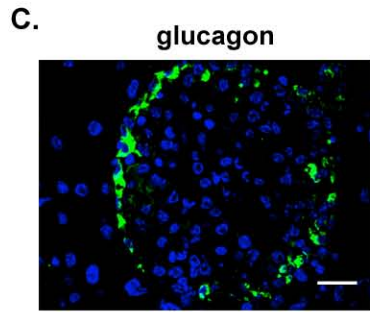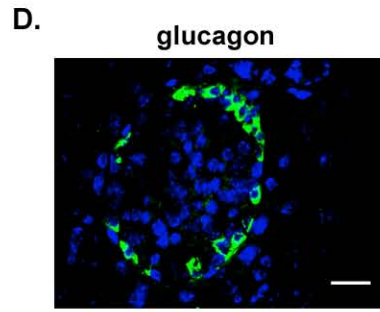

Fig. S3

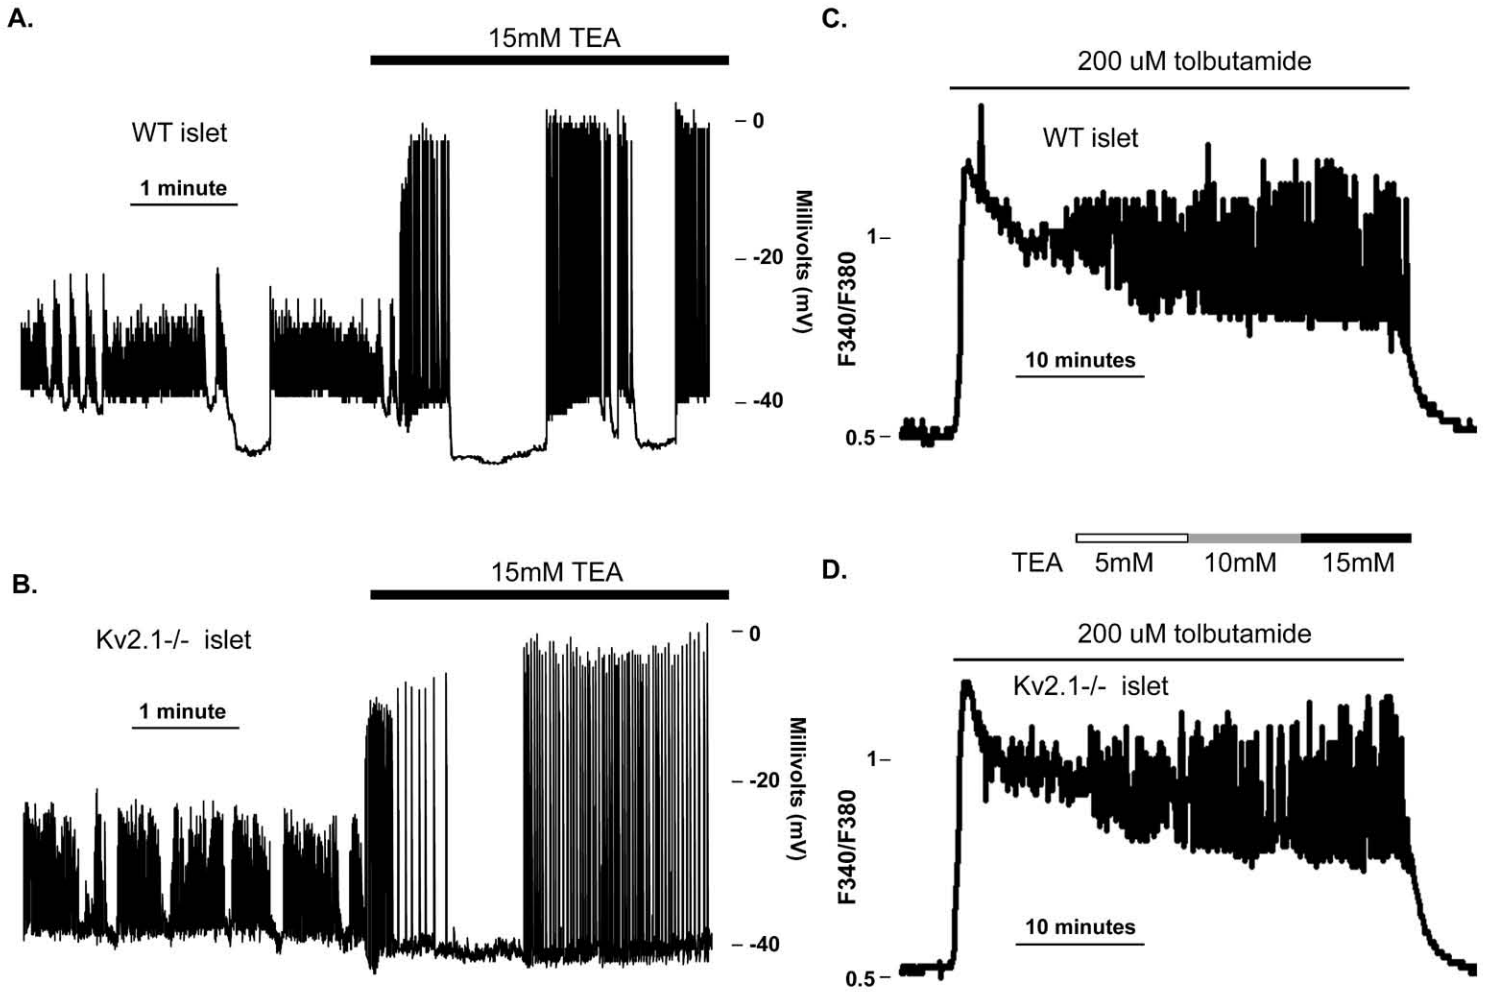

Fig. S4

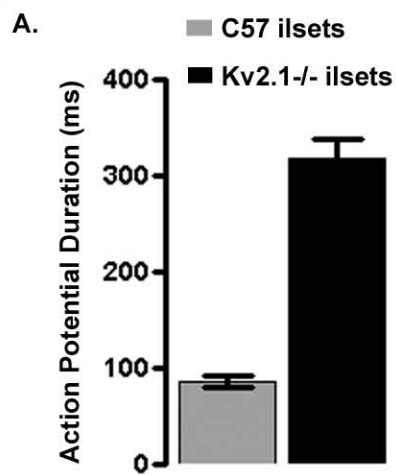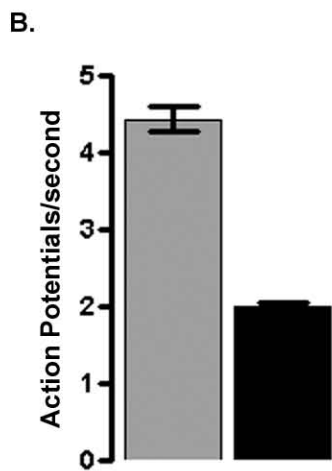

Supplement: NIHMS30076-supplement-01.pdf [file NIHMS30076-supplement-01.pdf]
